# Supplementary material
Source: PubMed Central journal article supplement (PMC5439111)
Supplement: CAS-103-593-s010.pdf [file CAS-103-593-s010.pdf]

**Supplemental Figure 7. Most significant *Runx1* target genes identified in microarray analysis.**

The top 30 genes upregulated and top 30 genes downregulated in *Runx1* KO colon are listed. Rankings are based on P values that were derived as described in the Methods section. Fold changes represent log base 2 values.

**upregulated in *Runx1*  
KO**

| GeneName               | SystematicName | logFC       | P.Value  |
|------------------------|----------------|-------------|----------|
| 1810030J14Rik (Mptx)   | NM_025470      | 5.757692843 | 1.63E-07 |
| Pnliprp2               | NM_011128      | 5.215545203 | 5.70E-07 |
| 9030623N16Rik (Duaxa2) | NM_025777      | 2.225191458 | 7.77E-07 |
| Retnlb                 | NM_023881      | 4.00415473  | 2.40E-06 |
| Prlpm                  | NM_019991      | 2.907227332 | 3.27E-06 |
| C4bp                   | NM_007576      | 1.932587853 | 6.61E-06 |
| Igh-VJ558              | BC004786       | 1.617860523 | 1.77E-05 |
| Krtap16-7              | NM_130875      | 2.03092357  | 2.00E-05 |
| Hemt1                  | AJ242831       | 0.933943477 | 3.23E-05 |
| Crisp3                 | NM_009639      | 1.448452515 | 3.43E-05 |
| Cd55                   | AK030285       | 1.128926456 | 3.71E-05 |
| Mlze                   | NM_031378      | 2.263532552 | 3.86E-05 |
| Frmd3                  | NM_172869      | 1.522260827 | 4.64E-05 |
| Ang1                   | NM_007447      | 3.146937983 | 6.07E-05 |
| Clps                   | NM_025469      | 2.344364538 | 6.09E-05 |
| Es1                    | NM_007954      | 2.827801086 | 7.47E-05 |

|                    |                    |             |             |
|--------------------|--------------------|-------------|-------------|
| Clca3              | NM_017474          | 2.605255844 | 7.69E-05    |
| ENSMUST00000089814 | ENSMUST00000089814 | 1.650682139 | 9.73E-05    |
| 9930109F21Rik      | NM_183194          | 2.237190876 | 0.000102432 |
| 9030611K07Rik      | NM_001001495       | 1.482020541 | 0.000106486 |
| St3gal6            | NM_018784          | 1.479578256 | 0.000114919 |
| Igj                | NM_152839          | 1.7948967   | 0.000116364 |
| AI987692           | NM_177912          | 2.457401038 | 0.000148348 |
| X78107             | X78107             | 3.117092791 | 0.000153778 |
| Ang3               | U72672             | 3.496373494 | 0.000165558 |
| Ang4               | NM_177544          | 3.67300839  | 0.00016845  |
| Ang2               | NM_007449          | 3.374637044 | 0.000203924 |
| Tgn                | NM_009375          | 1.021730071 | 0.000211181 |
| 2010309G21Rik      | AK008551           | 3.143594509 | 0.00023849  |

**downregulated in Runx1  
KO**

| GeneName      | SystematicName | logFC       | P.Value     |
|---------------|----------------|-------------|-------------|
|               |                | -           |             |
| 2210020M01Rik | NM_183259      | 0.774102873 | 0.000167414 |
|               |                | -           |             |
| Siglecf       | NM_145581      | 1.583324772 | 0.000192664 |
| Indo          | NM_008324      | -2.39132882 | 0.000198702 |
|               |                | -           |             |
| Hsd17b2       | NM_008290      | 0.735816425 | 0.000427566 |
|               |                | -           |             |
| Cd300lf       | NM_145634      | 2.015205905 | 0.000709416 |
|               |                | -           |             |
| Rorc          | NM_011281      | 0.809173427 | 0.001007035 |

|          |           |             |             |
|----------|-----------|-------------|-------------|
| Slc35e3  | NM_029875 | -1.09322822 | 0.001163408 |
|          |           | -           |             |
| Ehf      | NM_007914 | 0.670526278 | 0.001247631 |
|          |           | -           |             |
| Pclo     | NM_011995 | 0.614217606 | 0.001701841 |
|          |           | -           |             |
| Cyp4f14  | NM_022434 | 0.572621625 | 0.001884906 |
|          |           | -           |             |
| Rbp2     | NM_009034 | 0.612105488 | 0.002151015 |
|          |           | -           |             |
| Mt1      | NM_013602 | 0.978287661 | 0.00226052  |
|          |           | -           |             |
| AK008281 | AK008281  | 0.467190885 | 0.002289666 |
|          |           | -           |             |
| Abcb1b   | NM_011075 | 1.004531777 | 0.002467114 |
|          |           | -           |             |
| Slc4a8   | NM_021530 | 0.636341596 | 0.002477857 |
|          |           | -           |             |
| Slc6a13  | NM_144512 | 0.748796142 | 0.002929949 |
|          |           | -           |             |
| Cmah     | NM_007717 | 0.695990671 | 0.002942172 |
|          |           | -           |             |
| Abcb4    | NM_008830 | 0.840833761 | 0.003058603 |
|          |           | -           |             |
| Spa17    | NM_011449 | 0.484219249 | 0.003066261 |
|          |           | -           |             |
| Abcc5    | NM_013790 | 0.717480571 | 0.003092012 |
|          |           | -           |             |
| Lrrn6d   | NM_177250 | 0.508464055 | 0.003230045 |

|           |           |             |             |
|-----------|-----------|-------------|-------------|
| Egf       | NM_010113 | 0.714817814 | 0.003285601 |
| LOC667885 | XM_993103 | 0.690719094 | 0.003508458 |
| Tnrc4     | NM_172434 | 0.628487069 | 0.003633636 |
| Adam18    | NM_010084 | 1.161321529 | 0.00383398  |
| Slc6a7    | NM_201353 | 0.506531999 | 0.004026579 |
| Nrg4      | NM_032002 | 1.016379727 | 0.004136311 |
| Nov       | NM_010930 | 1.069044759 | 0.004181755 |
| Pdxk      | NM_172134 | 0.730018405 | 0.004226695 |
| AF055908  | AF055908  | 0.786811708 | 0.0043088   |
